# Supplementary material
Source: PubMed Central journal article supplement (PMC4567463)
Supplement: supp_WNL.0000000000001922_Tables.pdf [file supp_WNL.0000000000001922_Tables.pdf]

Table e-1: Clinical, paraclinical and immunological features of patients with VGKC-complex Abs and primary non-inflammatory diagnoses

| Demo-graphics        | Presentation                                                  | Investigations                                        | Diagnosis                    | VGKC-complex-Ab (pM) | Immunotherapy | Outcome (Follow-up, months)           |
|----------------------|---------------------------------------------------------------|-------------------------------------------------------|------------------------------|----------------------|---------------|---------------------------------------|
| 9 yr M<br>Caucasian  | Focal epilepsy with worsening seizures.                       | MRI: Left hippocampal sclerosis<br><br>CSF not done   | Focal epilepsy               | 105                  | Steroids      | Good response to steroids<br><br>(11) |
| 3 yr M<br>Caucasian  | Transient Hemiplegia                                          | MRI brain normal                                      | Undiagnosed                  | 111                  | Not treated   | Full recovery<br><br>(25)             |
| 14 yr M<br>Asian     | Motor tics                                                    | Not investigated                                      | Tic disorder                 | 117                  | Not treated   | Ongoing symptoms<br><br>(23)          |
| 8 yr M<br>Caucasian  | Long standing seizure disorder                                | MRI brain normal<br><br>CSF not done                  | Primary generalized epilepsy | 120                  | Not treated   | On-going seizures<br><br>(13)         |
| 16 yr F<br>Caucasian | Bilateral lower limb pain.<br>Long standing<br>Hypothyroidism | MRI brain and spine normal.<br><br>NCS and EMG normal | Undiagnosed                  | 125                  | Not treated   | Ongoing symptoms<br><br>(12)          |
| 10 yr M<br>Caucasian | Headaches, history of allergies                               | MRI brain normal                                      | Headaches                    | 128                  | Not treated   | Full recovery<br><br>(24)             |

|                                |                                                                                 |                                                             |                                                                           |     |             |                                                          |
|--------------------------------|---------------------------------------------------------------------------------|-------------------------------------------------------------|---------------------------------------------------------------------------|-----|-------------|----------------------------------------------------------|
| 4 yr F<br>African<br>Caribbean | New onset myoclonic seizures                                                    | MRI normal<br><br>CSF no cells                              | Myoclonic astatic epilepsy                                                | 143 | Not treated | On-going seizures.<br>Developmental concerns<br><br>(26) |
| 9 yr M<br>Asian                | Encephalopathy with worsening seizures.<br><br>Background learning difficulties | MRI: Bilateral grey matter heterotopia.<br><br>CSF no cells | Pyridoxine-dependent epilepsy (compound heterozygote mutation in ALDH7A1) | 158 | Not treated | On-going seizures<br><br>(26)                            |
| 14 m M<br>Caucasian            | Encephalopathy with prolonged seizures                                          | MRI: Cortical swelling                                      | Mitochondrial disorder with POLG mutation                                 | 394 | Not treated | Patient died                                             |

Table e-2. Clinical, paraclinical and immunological features of patients with VGKC-complex Abs levels under 400pM and primary inflammatory diagnoses

|   | Demo-graphics       | Presentation                                                    | Investigations                                                                                               | Diagnosis                 | VGKC-complex-Ab (pM) and additional antibodies | Immunotherapy       | Outcome<br>(Follow-up, months)            |
|---|---------------------|-----------------------------------------------------------------|--------------------------------------------------------------------------------------------------------------|---------------------------|------------------------------------------------|---------------------|-------------------------------------------|
| 1 | 9yr F<br>Asian      | Encephalopathy, seizures                                        | MRI: Increase leptomeningeal enhancement<br><br>CSF: WCC 15                                                  | Autoimmune encephalopathy | 103                                            | Not treated         | Cognitive<br>Behavior<br>Seizures<br>(48) |
| 2 | 16yr F<br>Caucasian | Encephalopathy, seizures, hallucinations                        | MRI: Signal change both hippocampi and amygdala, swelling of mesial temporal structures.<br><br>CSF no cells | Limbic encephalitis       | 107<br><br>TPO Abs 464 IU/mL                   | Steroids, IVIG      | Behavioral problems<br>(51)               |
| 3 | 13yr F<br>Caucasian | Muscle weakness and leg cramps<br><br>Background of scleroderma | Not done                                                                                                     | Myositis.                 | 112, hippocampal neurons positive              | Escalation of IT    | Myositis resolved<br>(42)                 |
| 4 | 2yr F<br>Caucasian  | Encephalopathy, seizures and movement disorder                  | MRI: Cortical restricted diffusion.<br><br>CSF no cells                                                      | Autoimmune encephalopathy | 113<br><br>TPO Abs 247 IU/ml                   | Steroid, PLEX, IVIG | Cognitive, behavior<br>(20)               |

|   |                                |                                                                 |                                                                                                                   |                              |                                                    |                      |                                                                       |
|---|--------------------------------|-----------------------------------------------------------------|-------------------------------------------------------------------------------------------------------------------|------------------------------|----------------------------------------------------|----------------------|-----------------------------------------------------------------------|
|   |                                |                                                                 |                                                                                                                   |                              |                                                    |                      |                                                                       |
| 5 | 11yr F<br>African<br>Caribbean | Subacute onset weakness of both lower limbs with frequent falls | MRI: multiple high signal lesions in the brain and spine<br><br>CSF: no cells, intrathecal OCB                    | Clinically isolated syndrome | 126                                                | Steroids             | Clinical relapse (relapsing remitting multiple sclerosis)<br><br>(26) |
| 6 | 6yr M<br>Asian                 | Ascending paralysis ophthalmoplegia and ataxia                  | MRI brain: Normal<br><br>MRI spine: Diffuse thickening and enhancement of ventral and dorsal roots (cauda equina) | GBS Miller Fisher variant    | 130                                                | Steroids             | Full recovery<br><br>(14)                                             |
| 7 | 13yr M<br>African<br>Caribbean | Encephalopathy, aphasia, hallucination, parkinsonism            | MRI brain: Normal.<br><br>PET reduce uptake in the cortex<br><br>CSF no cells                                     | Autoimmune encephalopathy    | 136<br><br>ASOT 400 IU, TPO<br>Abs 235 IU/ml       | Steroids<br><br>IVIG | Full recovery<br><br>(15)                                             |
| 8 | 10yr F<br>African<br>Caribbean | Encephalopathy, seizures, movement disorder                     | MRI brain: Widespread cortical signal change<br><br>CSF no cells                                                  | NMDAR-Ab encephalitis        | 138, hippocampal neurons positive<br><br>NMDAR abs | IVIG                 | Quadraparesis<br><br>Visual failure<br><br>Seizures<br><br>(60)       |
| 9 | 15yr F<br>African<br>Caribbean | Leg weakness and sensory loss                                   | Multiple shot segment myelopathy                                                                                  | Transverse myelitis          | 139                                                | Steroids             | Prolonged recovery course<br><br>(27)                                 |

|    |                     |                                                                                      |                                                                                                           |                           |                        |                              |                                                              |
|----|---------------------|--------------------------------------------------------------------------------------|-----------------------------------------------------------------------------------------------------------|---------------------------|------------------------|------------------------------|--------------------------------------------------------------|
| 10 | 13yr F<br>Asian     | Acute confusional state with strange behavior and hallucination and bradykinesia.    | MRI brain: Normal<br><br>CSF no cells                                                                     | Autoimmune encephalopathy | 140<br><br>ASOT 400 IU | Steroids                     | Relapse at 8months with good response to steroid<br><br>(29) |
| 11 | 3yr F<br>Caucasian  | Ataxia, urine incontinent, aphasia, seizure, hallucinations.                         | Reversible cerebellar signal change.<br><br>CSF no cells, mixed OCB                                       | Autoimmune encephalopathy | 149                    | Steroids                     | Emotional liability, Behavioral problems<br><br>(22)         |
| 12 | 2yr F<br>Caucasian  | Encephalopathy, confusion, seizures                                                  | MRI brain: Bilateral hippocampi and amygdala, swelling of mesial temporal structures.<br><br>CSF no cells | Limbic encephalitis       | 156                    | Steroids                     | Full recovery<br><br>(9)                                     |
| 13 | 4yr M<br>Caucasian  | Encephalopathy, seizures, hallucinations                                             | MRI brain: Normal<br><br>CSF no cells                                                                     | Autoimmune encephalopathy | 161                    | Steroids, IVIG, Azathioprine | On-going seizures. Cognitive<br><br>(60)                     |
| 14 | 9yr F<br>Caucasian  | Confusion, seizures, nystagmus, dysmetria and ataxia                                 | MRI brain: Normal<br><br>CSF no cells                                                                     | Autoimmune encephalopathy | 163                    | Not treated                  | Full recovery<br><br>(23)                                    |
| 15 | 15yr F<br>Caucasian | Relapsing chorea despite treatment with Pen V and valproate<br><br>Background of SLE | MRI brain; Normal<br><br>CSF no cells                                                                     | Sydenham chorea.          | 175                    | MMF for SLE                  | On going<br><br>(12)                                         |
| 16 | 16yr F              | Weakness, unsteadiness and                                                           | EMG and nerve conduction study                                                                            | Lambert–Eaton             | 175                    | Not treated                  | On going                                                     |

|    |                            |                                                |                                                                                          |                                      |     |             |                                              |
|----|----------------------------|------------------------------------------------|------------------------------------------------------------------------------------------|--------------------------------------|-----|-------------|----------------------------------------------|
|    | Caucasian                  | double vision                                  | indicative of presynaptic neuromuscular junction defect                                  | myasthenic syndrome                  |     |             | (63)                                         |
| 17 | 12yr F<br>Caucasian        | Encephalopathy, confusional state and seizures | MRI brain: Focal temporal cortical signal change<br><br>CSF WCC 20                       | Limbic encephalitis                  | 185 | Not treated | Ongoing seizures and memory prob<br><br>(60) |
| 18 | 2yr M<br>African Caribbean | Encephalopathy with disautonomia               | MRI: bilateral signal change in the medulla and corticospinal tracts<br><br>CSF no cells | Acute disseminated encephalomyelitis | 265 | Steroids    | Full recovery<br><br>(29)                    |
